# Supplementary material
Source: MDPI journal article supplement (https://www.mdpi.com/2673-4168/4/1/1)
Supplement: s1 [file s1]

**Table S1:** Changes of cardiometabolic risk factors of the metabolic syndrome in obese adults before and after the intensive lifestyle program.

|                            | <b>Baseline</b> | <b>9 months</b> | <b>18 months</b> | <b>P value</b> |
|----------------------------|-----------------|-----------------|------------------|----------------|
| <b>WC (cm)</b>             | 113.6 ± 13.3    | 107.8 ± 11.5    | 107.3 ± 13.4     | <0.0001        |
| <b>Elevated WC (n, %)</b>  | 31 (77.5)       | 29 (72.5)       | 26 (65.0)        | 0.455          |
| <b>TG (mmol/L)</b>         | 1.55 ± 0.60     | 1.24 ± 0.57     | 1.21 ± 0.59      | 0.0006         |
| <b>Elevated TG (n, %)</b>  | 27 (67.5)       | 22 (55)         | 18 (45.0)        | 0.082          |
| <b>HDL-C (mmol/L)</b>      | 1.19 ± 0.25     | 1.29 ± 0.34     | 1.27 ± 0.35      | 0.1820         |
| <b>Low HDL-C (n, %)</b>    | 23 (57.5)       | 16 (40.0)       | 14 (35.0)        | 0.134          |
| <b>Resting SBP (mmHg)</b>  | 131.1 ± 15.2    | 127.9 ± 12.9    | 130.0 ± 11.5     | 0.4107         |
| <b>Resting DBP (mmHg)</b>  | 80.70 ± 7.60    | 77.26 ± 5.65    | 77.26 ± 4.52     | 0.0014         |
| <b>Elevated BP (n, %)</b>  | 27 (67.5)       | 22 (55.5)       | 22 (55.5)        | 0.460          |
| <b>FPG (mmol/L)</b>        | 5.64 ± 0.82     | 5.45 ± 0.87     | 5.39 ± 0.94      | 0.0390         |
| <b>Elevated FPG (n, %)</b> | 10 (25.0)       | 6 (15.0)        | 6 (15.0)         | 0.310          |

WC: waist circumference, TG: triglycerides, HDL-C; high density cholesterol, SBP: systolic blood pressure, DBP: diastolic blood pressure, BP: blood pressure, FPG: fasting plasma glucose. Data presented are Means ± SD or n and %.

**Table S2:** Characteristics of participants for each remission groups

|                          | <b>MS</b>    | <b>T2DM</b>  | <b>IFG</b>   | <b>HTA</b>   |
|--------------------------|--------------|--------------|--------------|--------------|
|                          | <i>N</i> = 6 | <i>N</i> = 2 | <i>N</i> = 1 | <i>N</i> = 2 |
| <b>Men (n, %)</b>        | 4 (66.7)     | 2 (100)      | 1 (100)      | 1 (50)       |
| <b>Age (years)</b>       | 58 ± 6.57    | 54 ± 0.00    | 63           | 61.5 ± 4.95  |
| <b>METs baseline</b>     | 7.60 ± 1.05  | 9.47 ± 2.50  | 8            | 7.04 ± 1.6   |
| <b>METs at 18 months</b> | 8.7 ± 1.53   | 11.75 ± 1.20 | 8            | 7.33 ± 0.81  |

Among this group, 1 participant had a remission of MS and HTA and 1 participant had a remission of MS and T2DM. MS: metabolic syndrome, T2DM: type II diabetes, IFG: impaired fasting glycaemia, HTA: hypertension, METs: metabolic equivalent. Data presented are Means ± SD or n and %.
